# Supplementary material for: Comparison of hydrogen, halogen, and tetrel bonds in the complexes of HArF with YH3X (X = halogen, Y = C and Si)
Source: Royal Society of Chemistry journal article supplement (doi:10.1039/c5ra23556a), 2016-01-01
Supplement: c5ra23556a1.pdf [file c5ra23556a1.pdf]

## Supporting Information

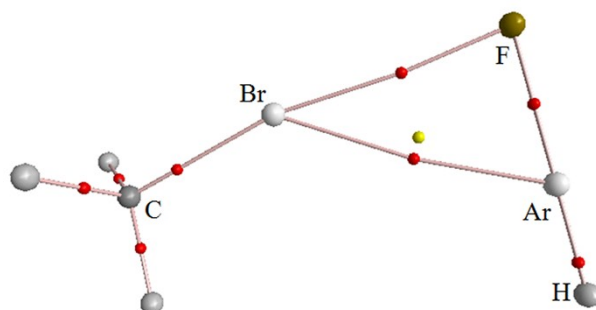

Figure S1. Molecular map of halogen-bonded complex  $\text{CH}_3\text{Br-HArF}$

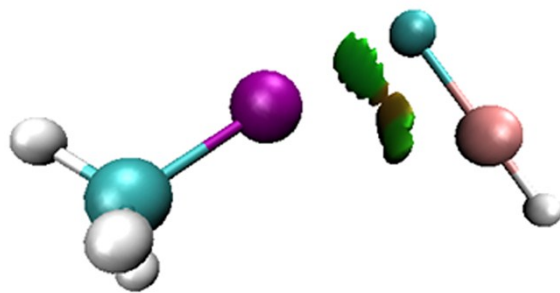

CH<sub>3</sub>Br-HArF-XB

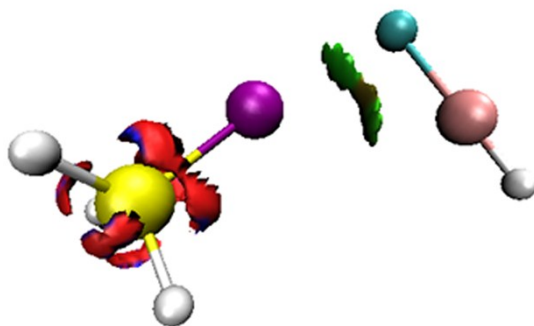

SiH<sub>3</sub>Br-HArF-XB

Figure S2 NCI maps of halogen-bonded complexes CH<sub>3</sub>Br-HArF and SiH<sub>3</sub>Br-HArF
